# Supplementary material for: Sprouty4 negatively regulates ERK/MAPK signaling and the transition from in situ to invasive breast ductal carcinoma
Source: PubMed Central journal article supplement (PMC8162601; doi:10.1371/journal.pone.0252314), 2021-05-28

**Figure: 2**  
Method: chemiluminescence to film

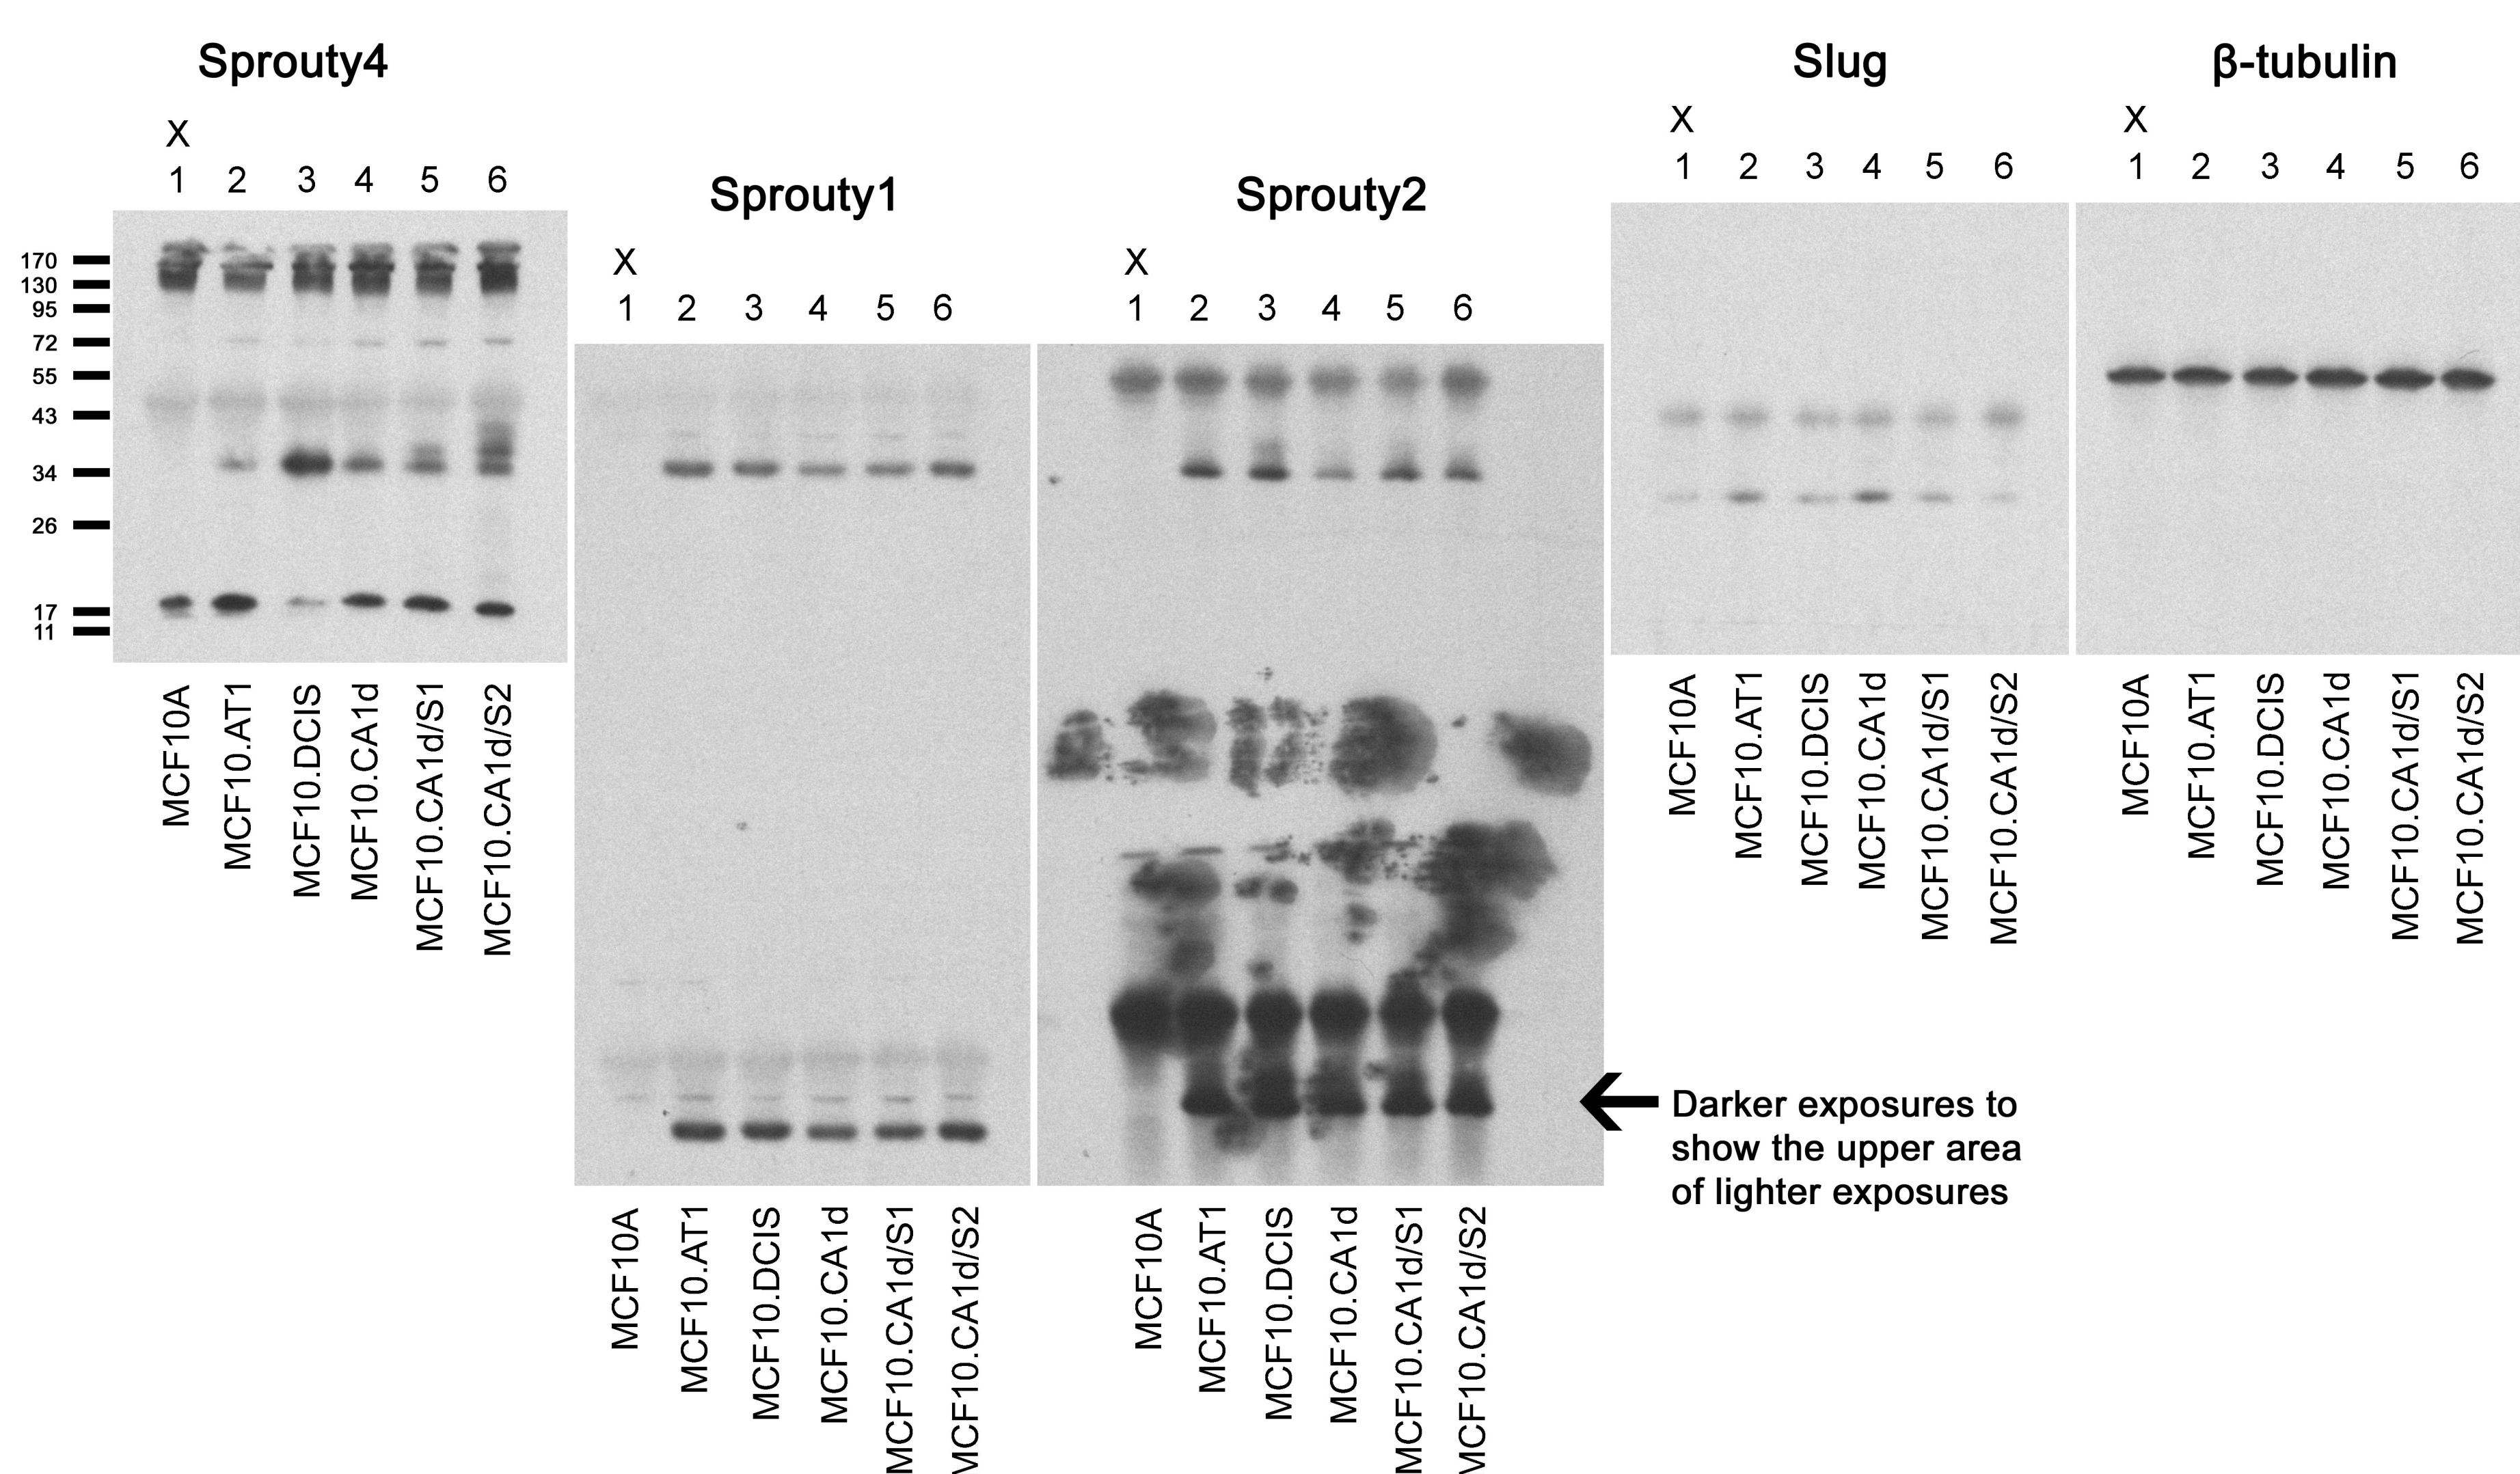

**Figure: 3**  
Method: chemiluminescence to film

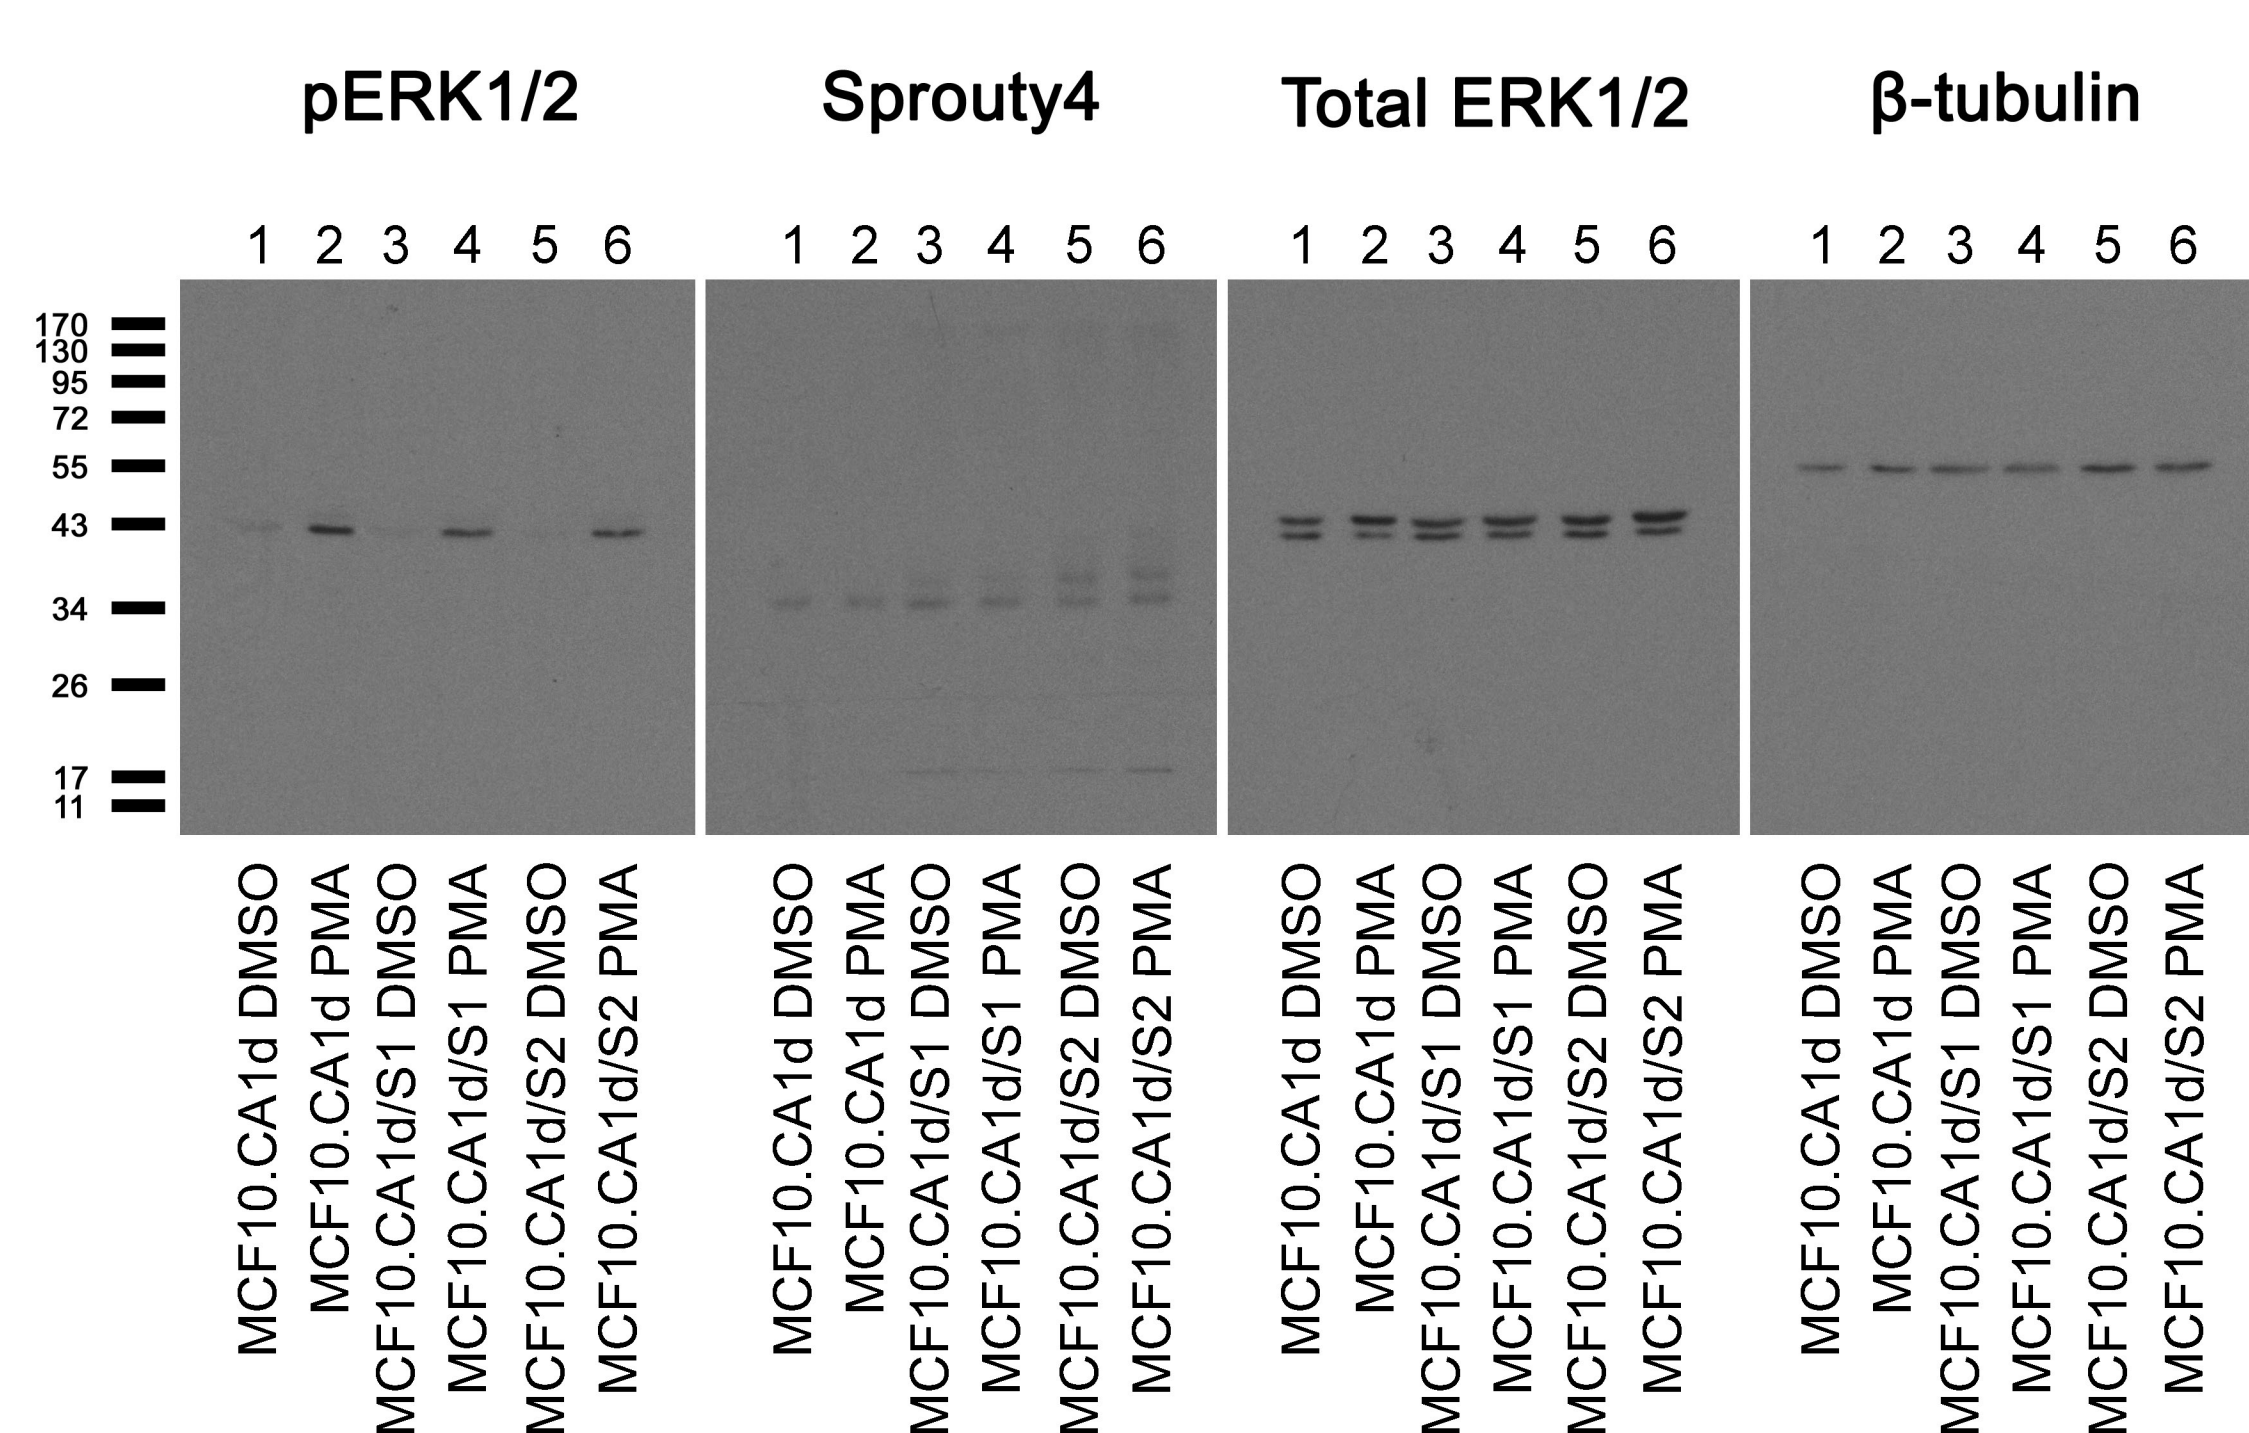

**Figure: 4**  
Method: chemiluminescence to film

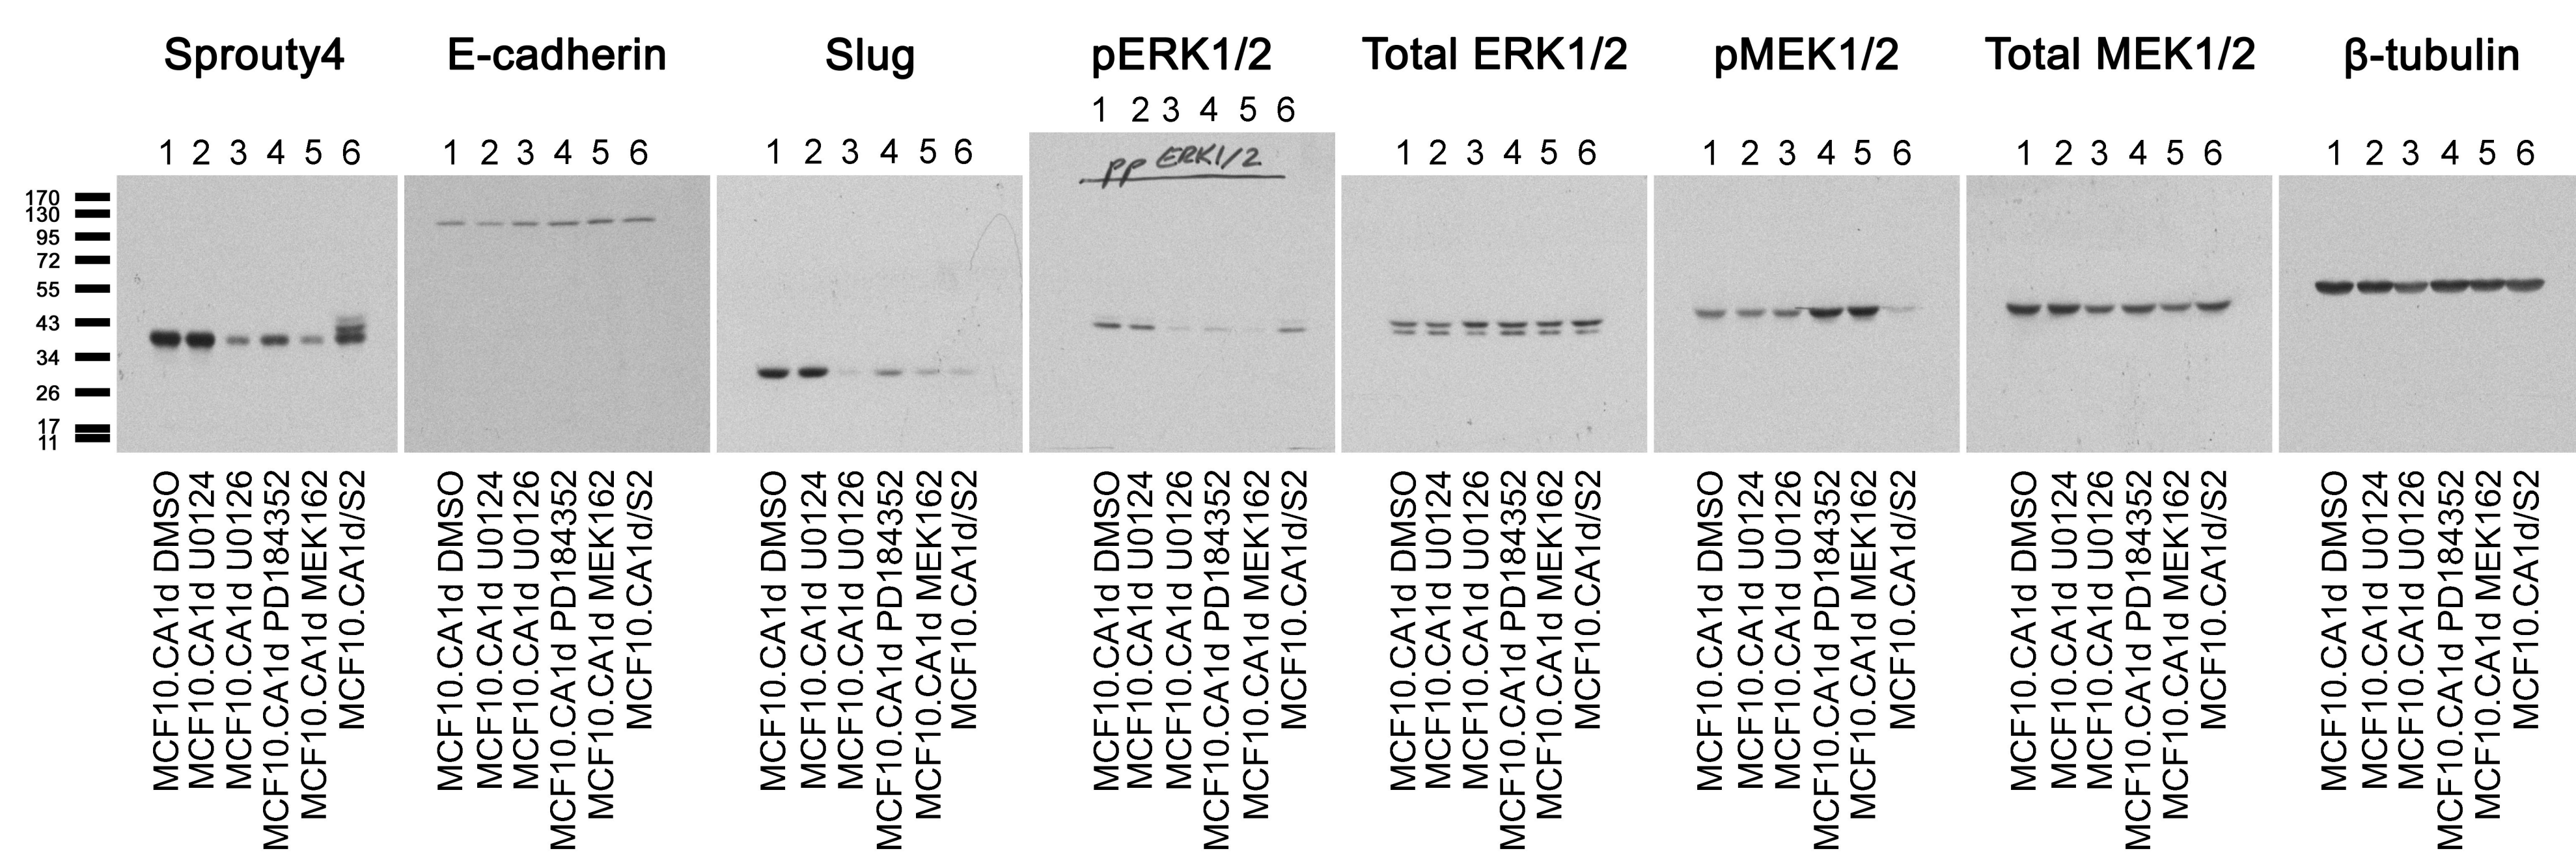

**Figure: 10**  
Method: chemiluminescence to film

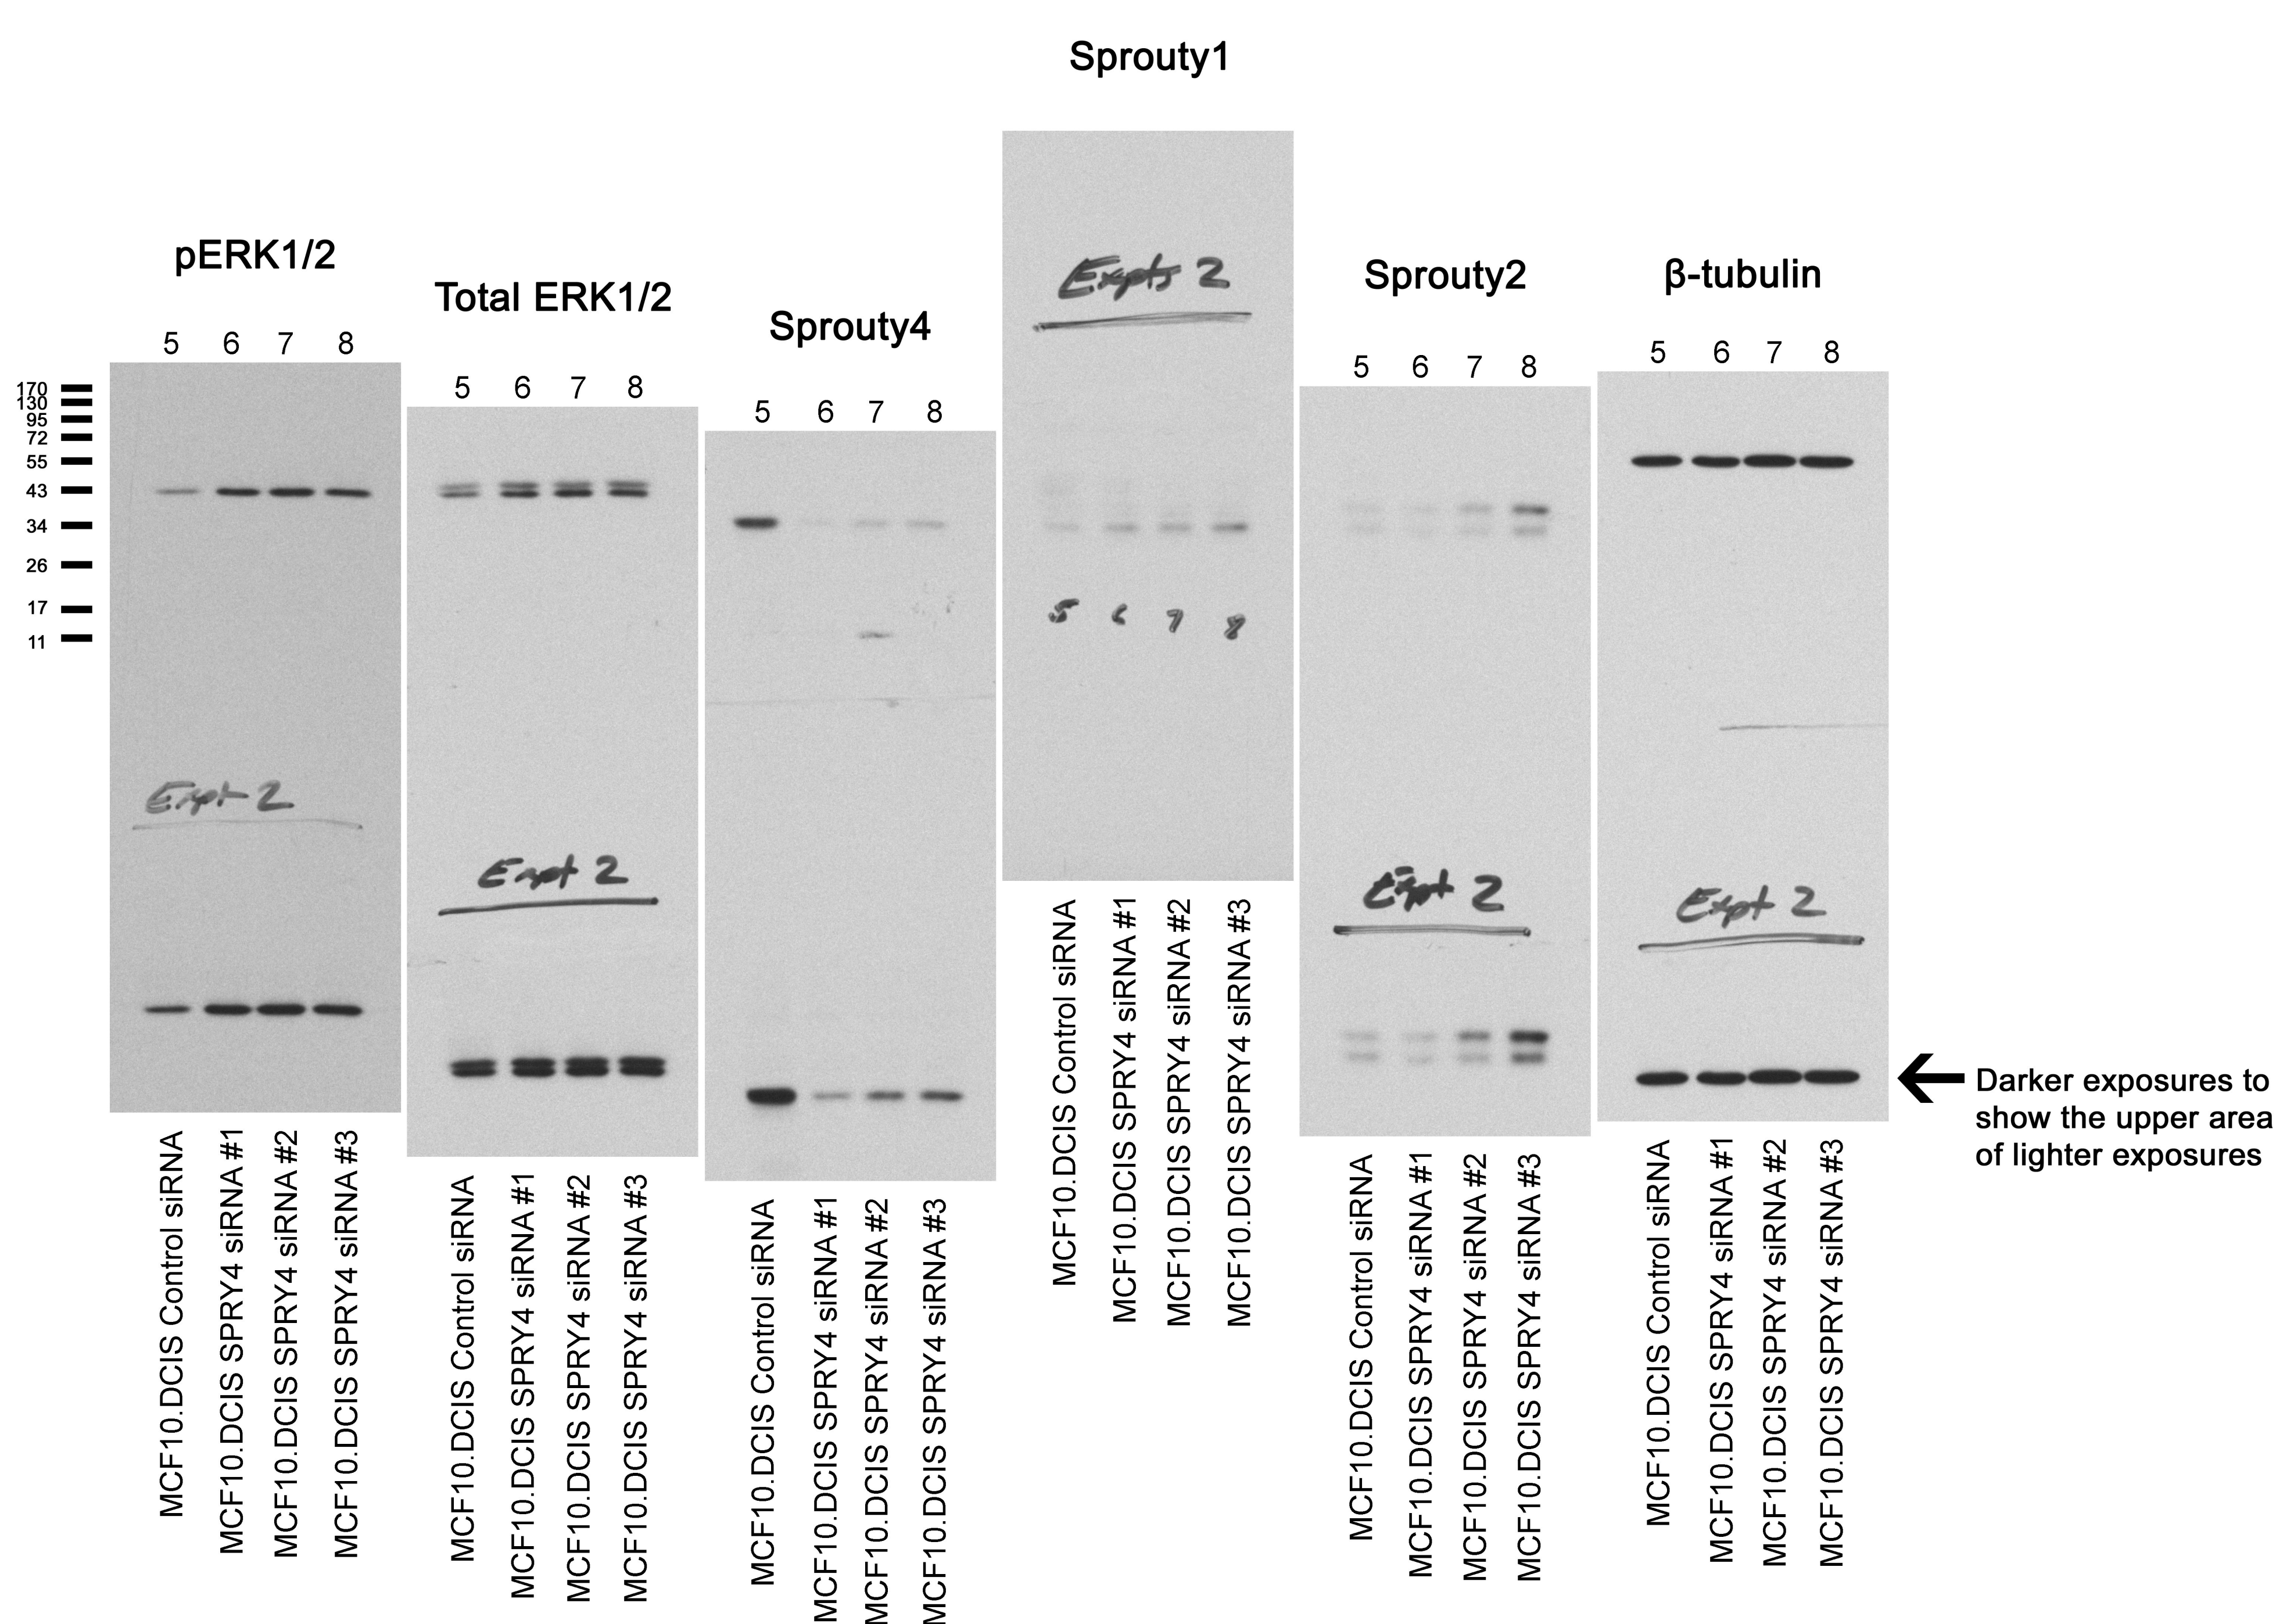

**Figure: 11**  
Method: chemiluminescence to film

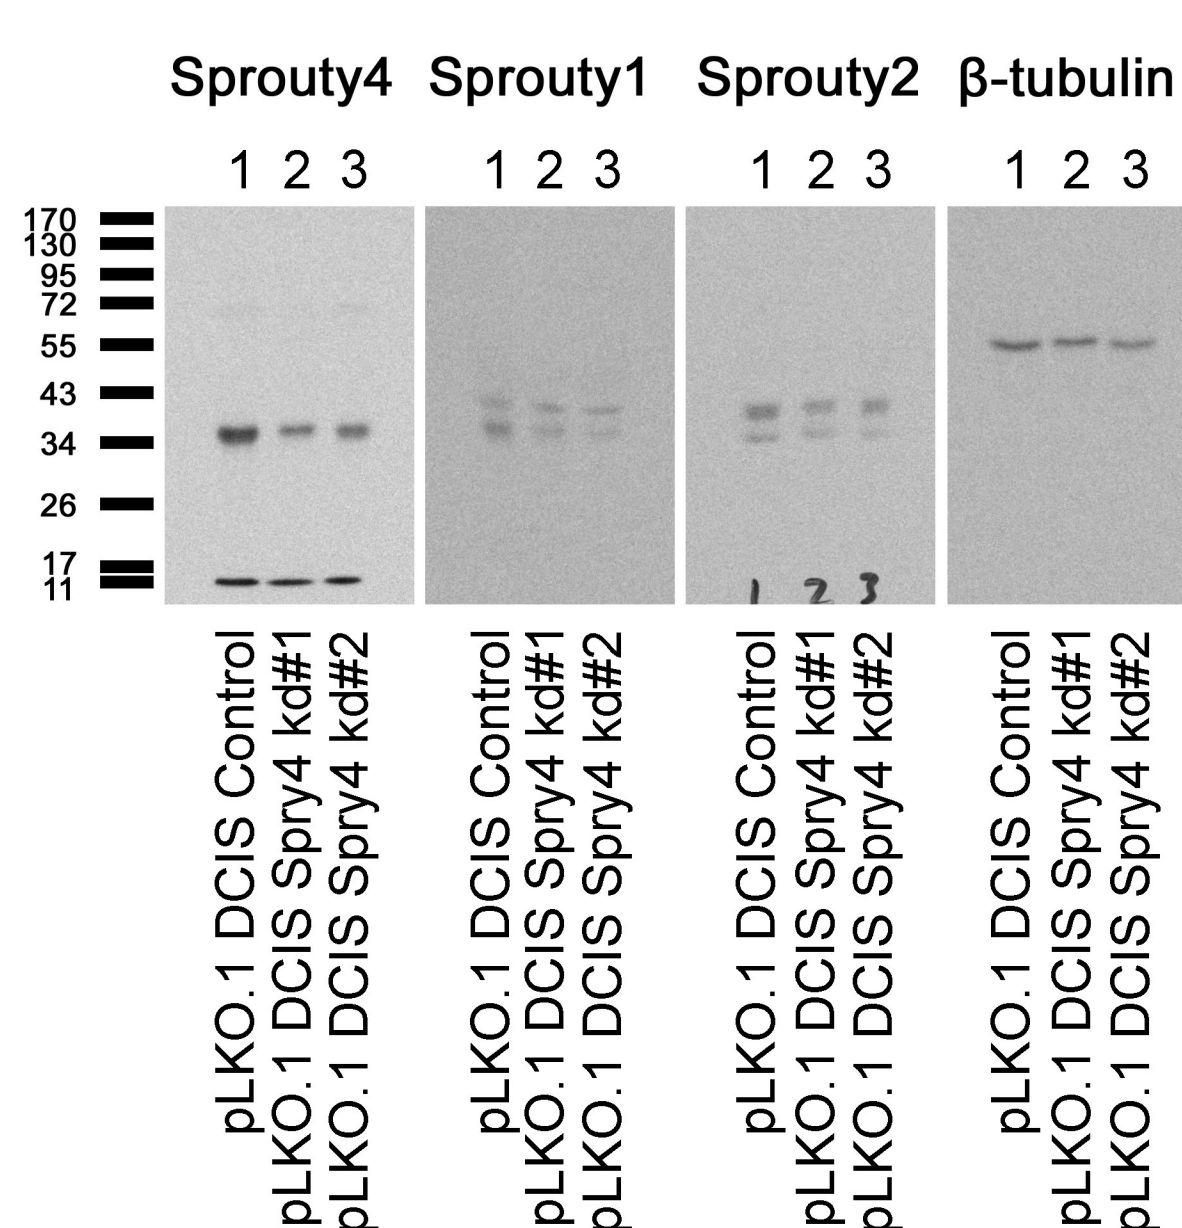

Supplement: pone.0252314.s010.pdf [file pone.0252314.s010.pdf]
